# Supplementary material for: ARNTL2, an Immunoregulation-Related Prognostic Biomarker in Pan-Cancer and Lung Adenocarcinoma
Source: Research Square preprint supplement (doi:10.21203/rs.3.rs-1065822/v1), 2021-11-23
Supplement: Supplementary file 1 [file 32a5a0a0243156a42a65bf8c.csv]

correlation	pvalue	type	label
0.0319746533146478	0.36522235701837	Camptothecin	non-significant
0.0914620619220441	0.0123901121345748	Vinblastine	positive
0.0619236126914233	0.0869769350089298	Cisplatin	non-significant
0.127631851381164	0.00046263482478267	Cytarabine	positive
0.0345763815629558	0.19129254063219	Docetaxel	non-significant
-0.0244093300871751	0.504762623083699	Gefitinib	non-significant
0.0649191942030858	0.0761913528585996	Navitoclax	non-significant
0.209141922501137	6.57631673167134e-09	Vorinostat	positive
0.201389407850706	2.43247071887072e-08	Nilotinib	positive
0.103052953719646	0.00450971754581982	Olaparib	positive
0.0333673469387755	0.819953307580024	Axitinib	non-significant
0.0282559900189359	0.436665090888923	AZD7762	non-significant
-0.126913550774373	0.225410628940557	SB216763	non-significant
-0.300260529743812	0.0381216256222169	KU-55933	negtive
0.00673008490010928	0.849168727552394	Afatinib	non-significant
-0.105121130494993	0.00351781053056948	Staurosporine	negtive
0.0314657991036895	0.375905423446006	PLX-4720	non-significant
-0.0722710453283996	0.629269186697755	NU7441	non-significant
0.289423373419673	0.0510663281326107	Doramapimod	non-significant
0.0629614584131672	0.0844539698892574	Wee1 Inhibitor	non-significant
0.250630245891949	1.76699714683384e-12	Nutlin-3a (-)	positive
0.150312997468094	4.77783920891394e-05	Mirin	positive
0.159832712515974	1.02000595789858e-05	PD173074	positive
-0.305157261794635	0.0370007315076437	ZM447439	negtive
0.0591705718315697	0.110921707758982	Alisertib	non-significant
-0.163156752062527	0.26784828241844	RO-3306	non-significant
0.203343449266581	1.33261845682609e-08	MK-2206	positive
0.166027926570612	3.84293618598921e-06	Palbociclib	positive
0.0596766883473865	0.102689938079595	Dactolisib	non-significant
0.0490740509110313	0.175691951993309	Pictilisib	non-significant
0.028199695622333	0.788450431873673	AZD8055	non-significant
0.00342708304146002	0.922851930395419	PD0325901	non-significant
0.0392402793680859	0.291018427081566	Obatoclax Mesylate	non-significant
0.0484008913262852	0.170887142580133	5-Fluorouracil	non-significant
-0.262483078042692	2.15210432920818e-13	Dasatinib	negtive
0.0600664848117149	0.0993278204965917	Paclitaxel	non-significant
0.106430896755943	0.00391678670136618	Crizotinib	positive
0.0936342824137681	0.0107144702973215	Rapamycin	positive
0.211758121483186	4.31228974495092e-09	Sorafenib	positive
-0.307157958320749	0.0451191055751487	BI-2536	negtive
0.0704242653672276	0.046727833474649	Irinotecan	positive
0.117451217769307	4.28062386462324e-06	Oxaliplatin	positive
-0.0124892369862133	0.732918260079364	BMS-536924	non-significant
0.125778053974719	0.000368496616895169	GSK1904529A	positive
-0.348892748588797	0.0150824260850352	Tozasertib	negtive
0.227854971775944	0.119332548946183	PF-4708671	non-significant
0.212887654186935	6.92332263102298e-09	PRIMA-1MET	positive
-0.0675416919529069	0.0646754825838042	Erlotinib	non-significant
0.202096867830138	3.95681717572332e-08	Niraparib	positive
-0.0167884510090269	0.642702990650133	MK-1775	non-significant
0.115602846036002	0.00182212863049821	Dinaciclib	positive
0.0238437299956447	0.51356417064519	Gemcitabine	non-significant
0.0683019375739325	0.0610218244369266	Bortezomib	non-significant
0.185301780286583	0.207337317955268	GSK269962A	non-significant
0.31133069828722	0.0373654085108724	SB505124	positive
0.117841715141803	0.00119698259496516	Tamoxifen	positive
0.121726289180777	2.50732670971476e-06	Fulvestrant	positive
0.165310894710312	2.6677955804337e-06	EPZ004777	positive
0.0796870265523371	0.0292063540101701	YK-4-279	positive
0.157214166448886	0.0021141660703876	Daporinad	positive
0.126651365735505	0.000625185524376566	BMS-345541	positive
0.0819118037698303	0.0276378014397558	AZ960	positive
0.0818679634822249	0.0254462266039648	Talazoparib	positive
0.0341581227756647	0.35806838761531	XAV939	non-significant
-0.0643889718172256	0.0747200943822878	Trametinib	non-significant
0.135404625642135	0.000194064566759118	Dabrafenib	positive
0.0590687217335745	0.106716247390228	Temozolomide	non-significant
0.101683037095023	0.00610335232475574	AZD5438	positive
0.110310029458606	0.00297775523954779	IAP_5620	positive
0.0896705700374318	0.0156565171024181	AZD2014	positive
0.194731621450131	1.25749237264326e-07	AZD1208	positive
0.0360759893110387	0.331704440357304	AZD1332	non-significant
0.102070549183216	0.00591093228464811	Ruxolitinib	positive
0.196560822751286	2.07462080938788e-08	Linsitinib	positive
0.140648822315672	0.000112443088963975	Epirubicin	positive
0.132855074654157	0.000268832160551119	Cyclophosphamide	positive
0.0328570666085368	0.36984452737483	Pevonedistat	non-significant
-0.0905853290395766	0.010365087704871	Sapitinib	negtive
0.191483792233355	1.22499035677858e-13	Uprosertib	positive
0.0512212164772826	0.168296511646139	LCL161	non-significant
0.0649937989360387	0.0744896902410933	Lapatinib	non-significant
-0.00620123380686859	0.860895322494692	Luminespib	non-significant
0.0897039003614559	0.0110867638441494	Alpelisib	positive
0.0422149681974838	0.232700288876213	Taselisib	non-significant
0.139613708747334	7.58504118227187e-05	EPZ5676	positive
-0.0226489572639957	0.52237439499793	SCH772984	non-significant
0.156277638086121	2.37207589334299e-05	IWP-2	positive
0.144054318174958	9.81580068708329e-05	Leflunomide	positive
0.200435071490913	4.52077719359302e-08	Entinostat	positive
0.179846874519377	0.0034889747814162	OSI-027	positive
0.140145054914148	6.96883692261318e-05	LGK974	positive
0.101498328330804	0.00619703618471665	VE-822	positive
0.164199396090148	8.71408592066518e-06	WZ4003	positive
0.138462032980236	0.000182280907416664	CZC24832	positive
0.143867138554046	0.000114509834495664	AZD5582	positive
0.100724143586406	0.00687141480364128	GSK2606414	positive
0.11989359646231	0.00120973650005641	PFI3	positive
0.186114354011281	4.41151093713725e-07	PCI-34051	positive
0.14531337966471	8.51195829955519e-05	Wnt-C59	positive
0.0997622215329484	0.00718267364506241	I-BET-762	positive
0.115554163012553	0.00183031724146709	RVX-208	positive
0.0903696409664596	0.0148611852985183	OTX015	positive
0.122245339135829	0.000972878530348737	GSK343	positive
0.165634824657993	7.24835508742846e-06	ML323	positive
-0.035911288049633	0.333918091190524	Entospletinib	non-significant
0.138623065154135	0.000179118086272579	PRT062607	positive
0.165587419056429	0.271430359940998	Ribociclib	non-significant
0.148585264928894	5.84531872638211e-05	AGI-6780	positive
0.128084536403346	0.000541236746961306	Picolinici-acid	positive
0.131260861966624	0.000394777078668205	AZD5153	positive
0.112878549082155	0.00233581857483283	CDK9_5576	positive
0.165358124097624	7.62089797419039e-06	CDK9_5038	positive
0.170831984879795	3.90666734441307e-06	Eg5_9814	positive
0.038021170164517	0.306278629900796	ERK_2440	non-significant
-0.000245530945577946	0.994730584229049	ERK_6604	non-significant
0.0917170114341467	0.0134279539112354	IRAK4_4710	positive
0.181508959276657	8.51530152755435e-07	JAK1_8709	positive
0.243828896637262	3.11926070034613e-11	AZD5991	positive
0.126875925992987	0.000616632194701362	PAK_5339	positive
0.149798954228196	5.13556221653513e-05	TAF1_5496	positive
0.081922547586618	0.0275097566130303	ULK1_4989	positive
0.039870296188657	0.283335647738117	VSP34_8731	non-significant
-0.0135280353957185	0.715937772669488	Selumetinib	non-significant
0.10563422548805	0.00440847593835233	IGF1R_3801	positive
0.0944468438987504	0.0108927495644243	JAK_8517	positive
0.164674138257063	5.56344316607962e-06	AZD4547	positive
0.032947905121565	0.376686407246622	Ibrutinib	non-significant
0.167792059953517	5.47976491486853e-06	Zoledronate	positive
0.000914778778719136	0.980369483266089	Acetalax	non-significant
0.193260043049059	1.53882706602718e-07	Carmustine	positive
0.0456160558642093	0.219590456116065	Topotecan	non-significant
0.0792607415868725	0.0327355054527655	Teniposide	positive
0.117086995397569	0.00157619006259239	Mitoxantrone	positive
0.0413798253139192	0.113633754345837	Dactinomycin	non-significant
0.134221571333764	0.000287056492094791	Fludarabine	positive
0.151052967192492	4.43316018394901e-05	Nelarabine	positive
0.123751010322165	0.000875920600489667	Vincristine	positive
0.117306262575739	0.00154425055901225	Podophyllotoxin bromide	positive
0.0679434217464066	0.0676812245155095	Dihydrorotenone	non-significant
0.156954829848027	2.15570994449517e-05	Gallibiscoquinazole	positive
0.21744654245342	3.22248116426951e-09	Elephantin	positive
0.122144816845502	0.000974448685482682	Sinularin	positive
0.247631724359273	1.40788645990114e-11	Sabutoclax	positive
0.120239525558762	0.00117046562336215	LY2109761	positive
0.122590783456022	0.0009331796029315	OF-1	positive
0.105390383462764	0.00447322595635106	MN-64	positive
0.107572016622221	0.00370916265238648	KRAS (G12C) Inhibitor-12	positive
0.0109639669498252	0.761467202365543	MG-132	non-significant
0.0119302457603382	0.744445821637992	BDP-00009066	non-significant
0.0700957140715249	0.0551712647375795	Buparlisib	non-significant
0.0719353106956303	0.0053912887007604	Ulixertinib	positive
0.165838817538695	4.76419669740077e-06	Venetoclax	positive
0.0789428750177738	0.030864579224245	ABT737	positive
0.146440785524884	5.81762852483445e-05	Afuresertib	positive
0.148571257219965	4.46571073701761e-05	AGI-5198	positive
-0.0319179276840926	0.380513585129297	AZD3759	non-significant
0.104620521512609	0.0041526439020602	AZD5363	positive
0.048964080449512	0.180698587339831	AZD6738	non-significant
-0.00364637344371014	0.920640368225246	AZD8186	non-significant
0.0568428492892484	0.120106668015603	Osimertinib	non-significant
0.136173836059487	0.000185498821797257	Cediranib	positive
0.129975796605813	0.000361977177540547	Ipatasertib	positive
0.0882808736068769	0.0156600377280546	GDC0810	positive
0.0498461409205312	0.177044187502674	GNE-317	non-significant
0.162432819516932	7.90585757523281e-06	GSK2578215A	positive
0.190590777007489	1.4754336283227e-07	I-BRD9	positive
0.0515591983607377	0.158644211152566	Telomerase Inhibitor IX	non-significant
0.189688737813887	1.72507873687598e-07	MIRA-1	positive
0.176601186608883	1.15386315149243e-06	NVP-ADW742	positive
0.112607440937292	0.00202527908282039	P22077	positive
0.0698093488452285	0.0563404985080029	Savolitinib	non-significant
0.0453404253800076	0.215184228659959	UMI-77	non-significant
0.029100186614245	0.426779068866678	WIKI4	non-significant
-0.00920937006918315	0.801330797954447	Sepantronium bromide	non-significant
0.0934291004293004	0.0105190720498452	MIM1	positive
-0.0073796220272306	0.840206049545034	WEHI-539	non-significant
0.0644027044972619	0.0781623355972284	BPD-00008900	non-significant
0.122712898590102	0.00077661718660088	Foretinib	positive
0.149752263096324	4.01694780980197e-05	BIBR-1532	positive
0.134252713856098	0.000233391782309091	Pyridostatin	positive
0.138369197157157	0.000153036904016376	AMG-319	positive
0.119440801874573	0.00108110146442959	MK-8776	positive
0.066398086001454	0.0699104652048817	Vinorelbine	non-significant
0.0425002542350171	0.247253820754402	VX-11e	non-significant
0.120123617315505	0.00103547528537045	LJI308	positive
0.133150455756495	0.000273141161997894	AZ6102	positive
0.0703491250536764	0.0554376563602338	GSK591	non-significant
0.0947146629371059	0.00988843348417319	VE821	positive
-0.0685707678075856	0.646967812767034	AZD6482	non-significant
0.0941794729279643	0.0102641664770291	AT13148	positive
0.193375616631431	0.208502900676492	BMS-754807	non-significant
-0.143038852913969	0.337476510508088	JQ1	non-significant
